# Supplementary material for: Interleukin-18 and outcome after allogeneic stem cell transplantation: A retrospective cohort study
Source: PubMed Central journal article supplement — eBioMedicine. 2019 Nov 1;49:202–12. doi: 10.1016/j.ebiom.2019.10.024 (PMC6945194; doi:10.1016/j.ebiom.2019.10.024), 2019-11-01

# SUPPLEMENT

## METHODS

### GVHD prophylaxis, diagnosis, and treatment

GVHD was clinically and histologically diagnosed and graded using standard criteria. Prophylaxis and treatment of GVHD were performed as reported previously [1]. In both centres, recipients of allografts from unrelated donors (UD) usually received antithymocyte globulin (ATG) treatment. However, in both centres there are also exceptions from this institutional policy which are reflected by the fact that ATG use does not match the proportion of UD allografts.

### Assessment of serum levels of total IL-18, IL-18-binding protein A, CXCL9/MIG, ST2 and calculation of free IL-18 serum levels

Serum levels of IL-18, IL-18-binding protein A (IL-18BP<sub>A</sub>), C-X-C motif ligand 9 (CXCL9)/monokine induced by gamma-interferon (MIG) and soluble suppression of tumorigenicity 2 (ST2) were assessed by ELISA using commercial kits (DuoSet, R&D Systems, Wiesbaden, Germany) according to the manufacturer's instructions. All measurements were performed centrally in the Heidelberg centre. The concentration of free IL-18 was calculated on the basis of the concentrations of total IL-18 and total IL-18BP<sub>A</sub> as determined by ELISA applying the law of mass action, a 1:1 stoichiometry in the complex of IL-18 and IL-18BP<sub>A</sub> and a dissociation constant (K<sub>d</sub>) of 400 pM [2]. All values were given in pg/mL.

### Single nucleotide polymorphism (SNP) analyses

A total of 9 polymorphisms for IL-18 and IL18-BP genes were identified by tagging approach from 1000 Genomes database for the Caucasian population. A region of 40 kb (hg19:11:112,003,974-112,044,840) flanking IL-18 was screened and 5 SNPs (rs360718, rs544354, rs5744256, rs7106524, rs5744276) with minor allele frequency  $\geq 0.05$  were selected. A region of 27 kb (hg19:11:71,699,587-71,726,761) containing IL-18BP was screened and 4 SNPs (rs2298455, rs3814721, rs61890895, rs3793941) that have minor allele frequency  $\geq 0.05$  were selected. Genomic DNA from patients and controls was genotyped using an allele-specific method (TaqMan technology, Applied Biosystems, Foster City, CA). For quality control purpose, 10% of the samples were blindly replicated. PCR plates were read on a ViiA7 real time instrument (Applied Biosystems) and QuantStudio Real-Time PCR Software was used to call genotypes. The 5 polymorphisms for IL-18 (rs5744276, rs7106524, rs5744256, rs544354, rs360718) and the 4 polymorphisms for IL-18BP (rs61890895, rs3814721, rs2298455, rs3793941) tag an additional 60 SNPs ( $r^2 \geq 0.8$ ) based on 1000 genome database for CEU population.

### Supplemental statistical methods

For definition of relapse standard disease corresponding criteria were applied. All patients were followed regularly post-transplant. Besides assessment of clinical signs of disease progression (including blood differential), the remission status post-transplant was assessed on regular basis on day +28 for patients with myeloproliferative neoplasms, myelodysplastic syndrome, multiple myeloma and acute leukaemia (bone marrow, MRD, donor chimerism). Remission status for lymphoma patients, and in cases when imaging techniques were necessary, was usually assessed on day+100. In patients with progressive disease prior to transplant, time to relapse was defined as time from day of transplant to first signs of relapsing disease including both standardised criteria (bone marrow, serology, and imaging) and clinical signs of disease progression/relapse.

To assess the relation of pre-transplant free IL-18 on age and hematopoietic cell transplantation-specific comorbidity index (HCT-CI according to Sorror et al. [3]), the Jonckheere trend test was applied [4]. The Kaplan-Meier method was used to estimate distributions of survival times. Follow-up times were calculated by the reverse Kaplan-Meier estimate [5].

Cause-specific Cox regression was applied for non-relapse mortality (NRM). Since the primary endpoint in our study was overall survival (OS) after alloSCT, the cause-specific approach, which allows for separate assessment of the relationship between each covariate and each hazard of interest (in our case, NRM and disease relapse) was chosen over the subdistribution hazards regression model, as it may provide more insight into the mechanisms leading to treatment failure (i.e. death post-transplant). The advantage of cause-specific Cox regression is that it gives detailed insights into the relationship between a risk factor and each separate outcome. Its major shortcoming is represented by the fact that the cumulative incidence of a specific event (for example NRM) is dependent on the cause-specific hazards of all events. In contrast, the coefficients resulting from the subdistribution hazards regression model do have a direct relationship with the cumulative incidence, but the insight into the effect of a covariate on a cause-specific hazard instead of a probability is lost.

Violation of proportional hazards assumption was tested for by the cox.zph plots, which give an estimate of the time-dependent coefficient  $\beta(t)$ . Since the proportional hazards assumption for pre-transplant free IL-18 was

violated for OS after the 5<sup>th</sup> post-transplant year, the data set was restricted to the first 5-year epoch post-transplant. Since mortality following the onset of acute GVHD is most pronounced in the first year after alloSCT the observation period for the associations of pre-transplant free IL-18 with OS and NRM after acute GVHD was confined to the first year after onset of acute GVHD.

To illustrate the continuous effects on the different endpoints, patients were grouped according to the quartiles of free IL-18 and the observation period was restricted to the first 5 years post-transplant for pre-transplant free IL-18 and the first post-transplant year for day+28 (d+28) free IL-18.

Prediction error curves and concordance indices were generated to evaluate the uni- and multivariable effects applying Cox models on OS and cause-specific Cox models on NRM based on the effect of pre-transplant free IL-18. To validate the effect of pre-transplant free IL-18 the model was fitted with an offset which was equal to the effect in the model from the training cohort. Through the offset, the effect was transferred to the model for the validation cohort. The models included the same covariates: age, disease stage, diagnosis, MMUD *versus* RD/MUD, conditioning intensity (reduced-intensity conditioning *versus* others), ATG treatment, and sex of donor and recipient re-estimated on the validation cohort to consider possible differences between the cohorts. The 632+ bootstrap method was applied for the estimation of the prediction error [6,7]. In all, 1,000 bootstrap subsamples were drawn from the validation data set, and the two models explained above were fitted in each subsample. The resulting predictive model was then fitted to the out-of-bag sample (patients not contained in the respective subsample) to estimate the survival probabilities and the time-dependent prediction error for all event times in the validation data set. Prediction error was estimated by using the Brier score and calculated as a weighted combination of the apparent estimate and the bootstrap estimate [6,8].

Comparison of the predictive performance of pre-transplant free IL-18 and d+28 free IL-18 was done by receiver operating characteristics (ROC) analysis using the DeLong's test [9] and by calculating the prediction error (integrated Brier score).

The relationship between pre-transplant serum levels of total and free IL-18, IL-18BP<sub>a</sub> and CXCL9/MIG and pre-transplant free IL-18 and absolute neutrophil counts on d+28 post-transplant were assessed by Spearman's rank correlation coefficients.

Genotype frequencies of SNPs were tested in patients for deviation from Hardy-Weinberg equilibrium (HWE) using Pearson's  $\chi^2$  test.

In order to provide guidance for possible interventions in the setting of alloSCT, an optimal cut-off determination with respect to NRM was performed in the training set. All pre-transplant free IL-18 levels were evaluated as cut-points and plotted against the corresponding Gray's test statistics in cumulative incidence function [10]. The resulting curve is a step function with jumps at every cut-point. The cut-off with highest Gray's test statistic was used as the optimal cut-off with clinical relevance also considered.

All statistical analyses were carried out in statistical software R, version 3.4.3, together with the R packages 'survival', version 2.43.3, 'cmprsk', version 2.2-7, 'maxstat', version 0.7-25, 'pec' version 2.5.4, 'DescTools' version 0.99.24, 'prodlim', version 2018.04.18, 'pec', version 2018.7.26, and 'riskRegression', version 1.43.

## RESULTS

### Correlations of pre-transplant serum levels of free IL-18 with additional patient characteristics in the training cohort

Pre-transplant free IL-18 levels were correlated to patient characteristics that reflect health and performance status, inflammatory states and comorbidities prior to transplant: age, sex, diagnosis, body-mass index (BMI), levels of C-reactive protein (CRP), Karnofsky performance status (KPS), HCT-CI and specific comorbidities prior to alloSCT (presence of diabetes, cardiovascular disease and infection as defined by Sorror et al. [3]). Information on BMI, CRP, KPS, HCT-CI and specific comorbidities were only available for the training cohort (supplemental **Table S1**).

Serum levels of pre-transplant free IL-18 were significantly lower in patients allografted for multiple myeloma (supplemental **Figure S1A**). However, in univariable analysis, the associations of higher pre-transplant free IL-18 levels with worse OS were similar in patients allografted for multiple myeloma and other malignancies (per 1-log<sub>2</sub> increase: HR 1.92, 95% CI 1.24-2.97,  $P=0.004$  and HR 1.24 95% CI 1.05-1.47,  $P=0.01$ , respectively). Median serum levels of pre-transplant free IL-18 were higher in patients with increased (>5 mg/L) pre-transplant CRP levels and lower ( $\leq 80\%$ ) KPS (supplemental **Figure S1C** and **S1G**). Further, there was a trend towards higher pre-transplant free IL-18 levels in patients with more advanced age and higher hematopoietic cell transplantation-specific comorbidity index (HCT-CI) (Jonckheere trend test, supplemental **Figure S1B** and **S1D**). No significant associations were found for patient sex, obesity (BMI  $\geq 30$  kg/m<sup>2</sup>), presence of cardiovascular disease, diabetes or infection prior to alloSCT and immunosuppression regimen and pre-transplant serum levels of ST2 (supplemental **Figure S1E, S1F, S1H-L**).

### **Predictive value of pre-transplant free IL-18**

The predictive performance of pre-transplant free IL-18 was assessed by calculation of the time-dependent concordance index and prediction error curves at all event times of the Cox models on OS and the cause-specific Cox models on NRM. In both cohorts, the univariable pre-transplant free IL-18 models showed a slightly improved prediction performance as compared to the respective references (supplemental **Figure S2**). In the context of the multivariable analyses, in both the training and the validation cohort prediction errors were lower and concordance indices were higher for the models that included pre-transplant free IL-18. Thus, a predictive value of pre-transplant free IL-18 for non-relapse and overall mortality can be assumed (supplemental **Figure S3**).

**Table S1. Additional patient characteristics of the training cohort.**

|                                                                         | <b>Training cohort<br/>n=589</b> |
|-------------------------------------------------------------------------|----------------------------------|
| <b>Parameter</b>                                                        |                                  |
| <b>Karnofsky performance status, n (%)</b>                              |                                  |
| >80%                                                                    | 481 (84)                         |
| ≤80%                                                                    | 95 (16)                          |
| Unknown                                                                 | 13                               |
| <b>Pre-transplant CRP [mg/L], median (IQR)</b>                          | 4.8 (1-12.0)                     |
| <b>Pre-transplant CRP, n (%)</b>                                        |                                  |
| ≤5 mg/L                                                                 | 299 (51)                         |
| >5 mg/L                                                                 | 284 (49)                         |
| Unknown                                                                 | 6                                |
| <b>Pre-transplant BMI [kg/m<sup>2</sup>], median (IQR)</b>              | 24.9 (22.6-28.1)                 |
| <b>Pre-transplant BMI, n (%)</b>                                        |                                  |
| <18.5 kg/m <sup>2</sup>                                                 | 11 (2)                           |
| 18.5-29.9 kg/m <sup>2</sup>                                             | 445 (81)                         |
| ≥30 kg/m <sup>2</sup>                                                   | 98 (17)                          |
| Unknown                                                                 | 35                               |
| <b>HCT-CI<sup>a</sup>, n (%)</b>                                        |                                  |
| 0                                                                       | 93 (18)                          |
| 1+2                                                                     | 148 (28)                         |
| ≥3                                                                      | 286 (54)                         |
| Unknown                                                                 | 62                               |
| <b>Diabetes mellitus<sup>b</sup>, n (%)</b>                             |                                  |
| Present                                                                 | 23 (4)                           |
| Absent                                                                  | 563 (96)                         |
| Unknown                                                                 | 3                                |
| <b>Cardiovascular disease<sup>c</sup>, n (%)</b>                        |                                  |
| Present                                                                 | 68 (12)                          |
| Absent                                                                  | 518 (88)                         |
| Unknown                                                                 | 3                                |
| <b>Infection<sup>d</sup>, n (%)</b>                                     |                                  |
| Present                                                                 | 47 (8)                           |
| Absent                                                                  | 539 (92)                         |
| Unknown                                                                 | 3                                |
| <b>Immunosuppression post-transplant, n (%)</b>                         |                                  |
| CsA + MTX                                                               | 163 (28)                         |
| CsA + MMF                                                               | 315 (53)                         |
| FK + MTX                                                                | 14 (2)                           |
| FK + MMF                                                                | 87 (15)                          |
| Post-transplant cyclophosphamide                                        | 10 (2)                           |
| <b>Pre-transplant ST2 serum level [pg/mL]<sup>e</sup>, median (IQR)</b> | 542 (308-1007)                   |

*Abbreviations:* BMI, body-mass index; CRP, C-reactive protein; CsA, cyclosporine A; FK, FK506 (tacrolimus); HCT-CI, hematopoietic cell transplantation-specific comorbidity index; IQR, interquartile range, MMF, mycophenolate mofetil; MTX, methotrexate; ST2, soluble suppression of tumorigenicity 2.

<sup>a</sup>HCT-CI according to Sorror et al. [3].

<sup>b</sup>Requiring treatment with insulin or oral hypoglycaemic agents but not diet alone.

<sup>c</sup>Congestive heart failure, myocardial infarction, or ejection fraction <50%, one or more vessel-coronary artery stenosis requiring medical treatment, stent, or bypass.

<sup>d</sup>Infection by date of HCT-CI assessment requiring continuation of antimicrobial treatment after day 0.

<sup>e</sup>Pre-transplant ST2 serum levels were available for 345 patients of the training cohort.

**Table S2. Association of pre-transplant free interleukin-18 with overall survival (OS), non-relapse mortality (NRM) and relapse after onset of acute GVHD in the training and validation cohorts (univariable analysis).**

|                                      | Training cohort <sup>a</sup><br>n=225                   |      | Validation cohort <sup>b</sup><br>n=537                 |       |
|--------------------------------------|---------------------------------------------------------|------|---------------------------------------------------------|-------|
|                                      | Free IL-18 per 1-log <sub>2</sub> increase <sup>c</sup> |      | Free IL-18 per 1-log <sub>2</sub> increase <sup>c</sup> |       |
|                                      | HR 95%CI                                                | P    | HR 95%CI                                                | P     |
| <i>Endpoint</i>                      |                                                         |      |                                                         |       |
| <b>OS after onset of aGVHD</b>       | 1.31 (0.97-1.77)                                        | 0.08 | 1.32 (1.10-1.60)                                        | 0.003 |
| <b>NRM* after onset of aGVHD</b>     | 1.36 (0.92-2.01)                                        | 0.13 | 1.37 (1.08-1.77)                                        | 0.01  |
| <b>Relapse* after onset of aGVHD</b> | 1.03 (0.75-1.43)                                        | 0.84 | 1.12 (0.88-1.42)                                        | 0.36  |

<sup>a</sup>Number of events: OS after acute GVHD, n=78; NRM after acute GVHD, n=46; relapse after onset of acute GVHD, n=47.

<sup>b</sup>Number of events: OS after acute GVHD, n=208; NRM after acute GVHD, n=123; relapse after onset of acute GVHD, n=118.

<sup>c</sup>Doubling of pre-transplant free IL-18 serum level.

\*Cause-specific hazard ratio.

*Abbreviations:* aGVHD, acute graft-versus-host disease; HR, hazard ratio; CI, confidence interval; IL-18, interleukin-18; HR, hazard ratio; OS, overall survival; NRM, non-relapse mortality.

**Table S3. Multivariable analysis of the training cohort with the endpoints overall survival (OS), non-relapse mortality (NRM) and relapse after allogeneic stem cell transplantation considering pre-transplant free IL-18 and additional patients characteristics as confounding variables (complete case analysis).**

|                                                   | Training cohort<br>n=484 |       |                  |      |                  |       |
|---------------------------------------------------|--------------------------|-------|------------------|------|------------------|-------|
|                                                   | OS                       |       | NRM*             |      | Relapse*         |       |
|                                                   | HR 95% CI                | P     | HR 95% CI        | P    | HR 95% CI        | P     |
| <b>Free IL-18 per 1-log2 increase<sup>a</sup></b> | 1.22 (1.02-1.46)         | 0.03  | 1.35 (1.01-1.81) | 0.04 | 1.06 (0.88-1.29) | 0.53  |
| <b>Age per 1-year increase</b>                    | 1.01 (0.99-1.02)         | 0.37  | 1.03 (1.01-1.05) | 0.01 | 0.99 (0.98-1.01) | 0.43  |
| <b>KPS</b>                                        |                          |       |                  |      |                  |       |
| >80%                                              | Ref                      |       | Ref              |      | Ref              |       |
| ≤80%                                              | 1.69 (1.19-2.40)         | 0.003 | 1.94 (1.12-3.35) | 0.02 | 1.84 (1.24-2.73) | 0.002 |
| <b>BMI</b>                                        |                          |       |                  |      |                  |       |
| <30 kg/m <sup>2</sup>                             | Ref                      |       | Ref              |      | Ref              |       |
| ≥30 kg/m <sup>2</sup>                             | 1.08 (0.76-1.54)         | 0.65  | 1.20 (0.70-2.06) | 0.51 | 1.24 (0.83-1.84) | 0.29  |
| <b>CRP</b>                                        |                          |       |                  |      |                  |       |
| ≤5 mg/L                                           | Ref                      |       | Ref              |      | Ref              |       |
| >5 mg/L                                           | 1.12 (0.84-1.49)         | 0.45  | 1.38 (0.89-2.16) | 0.16 | 0.90 (0.65-1.25) | 0.54  |
| <b>HCT-CI<sup>b</sup></b>                         |                          |       |                  |      |                  |       |
| <3                                                | Ref                      |       | Ref              |      | Ref              |       |
| ≥3                                                | 1.11 (0.83-1.47)         | 0.48  | 0.92 (0.59-1.44) | 0.73 | 1.38 (0.99-1.92) | 0.06  |

Number of events: OS, n=213, NRM, n=86; relapse, n=163.

*Abbreviations:* BMI, body-mass index; CRP, C-reactive protein; HCT-CI, hematopoietic cell transplantation-specific comorbidity index; KPS, Karnofsky performance status; IQR, interquartile range.

\*Cause-specific hazards from a competing risks analysis for relapse and NRM.

<sup>a</sup>Doubling of pre-transplant free IL-18 serum level.

<sup>b</sup>HCT-CI according to Sorror et al. [3].

**Table S4. Pre-transplant serum levels of total IL-18, IL-18BP<sub>a</sub> and free IL-18 according to different single nucleotide polymorphisms (SNP) in the IL-18 (A) and IL-18BP (B) gene (training cohort).**

| <b>A</b>           | <b>Total IL-18</b> |            |          | <b>IL-18BP<sub>a</sub></b> |            |          | <b>Free IL-18</b> |            |          |
|--------------------|--------------------|------------|----------|----------------------------|------------|----------|-------------------|------------|----------|
|                    | <b>Median</b>      | <b>IQR</b> | <b>P</b> | <b>Median</b>              | <b>IQR</b> | <b>P</b> | <b>Median</b>     | <b>IQR</b> | <b>P</b> |
| <b>IL-18 SNP</b>   |                    |            |          |                            |            |          |                   |            |          |
| <b>rs5744276</b>   |                    |            | *0.688   |                            |            | *0.064   |                   |            | *0.582   |
| GG                 | 624                | 448-672    | **0.540  | 5837                       | 5484-11152 | **0.030  | 399               | 292-518    | **0.298  |
| GC                 | 616                | 433-899    |          | 5279                       | 4624-11147 |          | 463               | 328-628    |          |
| CC                 | 629                | 439-943    |          | 5377                       | 4642-11879 |          | 466               | 327-703    |          |
| <b>rs7106524</b>   |                    |            | *0.281   |                            |            | *0.546   |                   |            | *0.202   |
| AA                 | 645                | 370-1073   | **0.014  | 5527                       | 4674-11564 | **0.978  | 419               | 293-816    | **0.504  |
| AG                 | 634                | 451-939    |          | 5330                       | 4613-10354 |          | 475               | 330-646    |          |
| GG                 | 607                | 428-788    |          | 5413                       | 4690-11475 |          | 411               | 304-586    |          |
| <b>rs5744256</b>   |                    |            | *0.733   |                            |            | *0.138   |                   |            | *0.568   |
| GG                 | 660                | 442-728    | **0.669  | 5837                       | 5388-10472 | **0.060  | 399               | 272-555    | **0.381  |
| AG                 | 614                | 421-846    |          | 5355                       | 4629-11245 |          | 461               | 314-611    |          |
| AA                 | 622                | 437-931    |          | 5376                       | 4642-11260 |          | 464               | 324-693    |          |
| <b>rs544354</b>    |                    |            | *0.942   |                            |            | *0.896   |                   |            | *0.736   |
| AA                 | 551                | 520-917    | **0.827  | 5668                       | 5420-5805  | **0.709  | 407               | 386-702    | **0.625  |
| AG                 | 612                | 542-934    |          | 5366                       | 4654-7248  |          | 470               | 337-630    |          |
| GG                 | 629                | 418-927    |          | 5388                       | 4645-10576 |          | 460               | 310-655    |          |
| <b>rs360718</b>    |                    |            | *0.454   |                            |            | *0.894   |                   |            | *0.475   |
| CC                 | 616                | 499-934    | **0.658  | 5388                       | 4692-7014  | **0.821  | 443               | 367-691    | **0.644  |
| AC                 | 611                | 424-820    |          | 5305                       | 4640-10476 |          | 458               | 297-592    |          |
| AA                 | 632                | 433-970    |          | 5450                       | 4659-11147 |          | 460               | 316-705    |          |
| <b>B</b>           | <b>Total IL-18</b> |            |          | <b>IL-18BP<sub>a</sub></b> |            |          | <b>Free IL-18</b> |            |          |
|                    | <b>Median</b>      | <b>IQR</b> | <b>P</b> | <b>Median</b>              | <b>IQR</b> | <b>P</b> | <b>Median</b>     | <b>IQR</b> | <b>P</b> |
| <b>IL-18BP SNP</b> |                    |            |          |                            |            |          |                   |            |          |
| <b>rs61890895</b>  |                    |            | *0.960   |                            |            | *0.515   |                   |            | *0.898   |
| AA                 | 692                | 612-700    | **0.781  | 5077                       | 4900-5233  | **0.701  | 480               | 419-539    | **0.807  |
| AC                 | 625                | 437-884    |          | 5580                       | 4642-11354 |          | 438               | 315-606    |          |
| CC                 | 622                | 435-914    |          | 5376                       | 4652-11645 |          | 462               | 318-644    |          |
| <b>rs3814721</b>   |                    |            | *0.413   |                            |            | *0.692   |                   |            | *0.427   |
| TT                 | 334                | 334-334    | **0.187  | 5233                       | 5233-5233  | **0.796  | 254               | 254-254    | **0.199  |
| CT                 | 635                | 439-905    |          | 5580                       | 4306-11147 |          | 471               | 315-615    |          |
| CC                 | 618                | 430-916    |          | 5376                       | 4674-11245 |          | 461               | 313-655    |          |
| <b>rs2298455</b>   |                    |            | *0.604   |                            |            | *0.918   |                   |            | *0.672   |
| CC                 | 437                | 381-762    | **0.452  | 5464                       | 4737-5765  | **0.780  | 340               | 289-573    | **0.562  |
| AC                 | 594                | 432-856    |          | 5388                       | 4808-10985 |          | 420               | 314-622    |          |
| AA                 | 629                | 446-929    |          | 5400                       | 4649-11544 |          | 463               | 323-655    |          |
| <b>rs3793941</b>   |                    |            | *0.187   |                            |            | *0.299   |                   |            | *0.259   |
| AA                 | 629                | 443-995    | **0.995  | 5356                       | 4715-11564 | **0.535  | 466               | 329-697    | **0.890  |
| AG                 | 602                | 419-807    |          | 5363                       | 4502-11261 |          | 419               | 295-580    |          |
| GG                 | 637                | 450-931    |          | 5478                       | 4905-11561 |          | 481               | 338-711    |          |

*Abbreviations:* IL-18, interleukin-18; IQR, interquartile range.

\**P* value for all (Kruskal-Wallis test: heterozygous genotype included); \*\**P* value for homozygous *versus* homozygous genotype.

Note: Hardy-Weinberg equilibrium was observed for all SNPs with the exception of the IL-18BP SNP rs3793941.

**Table S5. Day +28 serum levels of total IL-18, IL-18BP<sub>a</sub> and free IL-18 according to different single nucleotide polymorphisms (SNP) in the IL-18 (A) and IL-18BP (B) gene (training cohort).**

| <b>A</b>           | <b>Total IL-18</b> |            |          | <b>IL-18BP<sub>a</sub></b> |             |          | <b>Free IL-18</b> |            |          |
|--------------------|--------------------|------------|----------|----------------------------|-------------|----------|-------------------|------------|----------|
|                    | <b>Median</b>      | <b>IQR</b> | <b>P</b> | <b>Median</b>              | <b>IQR</b>  | <b>P</b> | <b>Median</b>     | <b>IQR</b> | <b>P</b> |
| <b>IL-18 SNP</b>   |                    |            |          |                            |             |          |                   |            |          |
| <b>rs5744276</b>   |                    |            | *0.351   |                            |             | *0.663   |                   |            | *0.311   |
| GG                 | 710                | 572-1203   | **0.266  | 17892                      | 15428-20098 | **0.752  | 353               | 267-580    | **0.195  |
| GC                 | 943                | 693-1265   |          | 18297                      | 15596-20691 |          | 452               | 344-606    |          |
| CC                 | 890                | 642-1282   |          | 17632                      | 14356-21091 |          | 443               | 330-583    |          |
| <b>rs7106524</b>   |                    |            | *0.438   |                            |             | *0.249   |                   |            | *0.420   |
| AA                 | 998                | 739-1269   | **0.415  | 17724                      | 14329-20082 | **0.714  | 496               | 339-626    | **0.256  |
| AG                 | 949                | 670-1283   |          | 18622                      | 15335-21320 |          | 459               | 332-595    |          |
| GG                 | 876                | 645-1260   |          | 17457                      | 15011-2061  |          | 419               | 329-583    |          |
| <b>rs5744256</b>   |                    |            | *0.918   |                            |             | *0.579   |                   |            | *0.827   |
| GG                 | 937                | 583-1258   | **0.845  | 19277                      | 15537-22545 | **0.306  | 410               | 276-627    | **0.596  |
| AG                 | 933                | 678-1273   |          | 17788                      | 15472-20617 |          | 448               | 336-605    |          |
| AA                 | 928                | 649-1282   |          | 17752                      | 14570-21077 |          | 447               | 337-583    |          |
| <b>rs544354</b>    |                    |            | *0.422   |                            |             | *0.206   |                   |            | *0.614   |
| AA                 | 1201               | 1028-1361  | **0.182  | 21793                      | 20693-22114 | **0.100  | 549               | 486-595    | **0.317  |
| AG                 | 931                | 653-1283   |          | 17722                      | 14603-20821 |          | 459               | 323-627    |          |
| GG                 | 933                | 673-1276   |          | 17768                      | 15164-20865 |          | 446               | 338-588    |          |
| <b>rs360718</b>    |                    |            | *0.220   |                            |             | *0.033   |                   |            | *0.287   |
| CC                 | 791                | 636-1106   | **0.194  | 16900                      | 13564-17993 | **0.020  | 406               | 330-530    | **0.244  |
| AC                 | 884                | 653-1239   |          | 18123                      | 15516-21069 |          | 435               | 336-564    |          |
| AA                 | 944                | 675-1283   |          | 18092                      | 14985-21209 |          | 482               | 325-627    |          |
| <b>B</b>           |                    |            |          |                            |             |          |                   |            |          |
|                    | <b>Total IL-18</b> |            |          | <b>IL-18BP<sub>a</sub></b> |             |          | <b>Free IL-18</b> |            |          |
|                    | <b>Median</b>      | <b>IQR</b> | <b>P</b> | <b>Median</b>              | <b>IQR</b>  | <b>P</b> | <b>Median</b>     | <b>IQR</b> | <b>P</b> |
| <b>IL-18BP SNP</b> |                    |            |          |                            |             |          |                   |            |          |
| <b>rs61890895</b>  |                    |            | *0.738   |                            |             | *0.325   |                   |            | *0.938   |
| AA                 | 1255               | 849-1495   | **0.481  | 22149                      | 19758-23108 | **0.156  | 530               | 370-637    | **0.770  |
| AC                 | 864                | 668-1245   |          | 17659                      | 13935-20377 |          | 429               | 336-618    |          |
| CC                 | 933                | 656-1277   |          | 17817                      | 15040-21092 |          | 445               | 332-591    |          |
| <b>rs3814721</b>   |                    |            | *0.309   |                            |             | *0.732   |                   |            | *0.225   |
| TT                 | 479                | 479-479    | **0.154  | 17400                      | 17400-17400 | **0.936  | 236               | 236-236    | **0.141  |
| CT                 | 1015               | 685-1269   |          | 17470                      | 14043-20853 |          | 449               | 357-626    |          |
| CC                 | 921                | 656-1277   |          | 18026                      | 15321-21183 |          | 442               | 331-583    |          |
| <b>rs2298455</b>   |                    |            | *0.798   |                            |             | *0.910   |                   |            | *0.745   |
| CC                 | 1089               | 656-1230   | **0.758  | 17702                      | 14134-20047 | **0.771  | 495               | 363-632    | **0.618  |
| AC                 | 876                | 643-1246   |          | 17596                      | 14086-21287 |          | 418               | 326-585    |          |
| AA                 | 930                | 661-1290   |          | 17811                      | 15250-20865 |          | 451               | 334-592    |          |
| <b>rs3793941</b>   |                    |            | *0.510   |                            |             | *0.560   |                   |            | *0.471   |
| AA                 | 986                | 665-1277   | **0.301  | 18258                      | 14268-21486 | **0.960  | 446               | 345-605    | **0.291  |
| AG                 | 886                | 664-1290   |          | 17307                      | 15103-20705 |          | 443               | 329-627    |          |
| GG                 | 896                | 642-1180   |          | 18393                      | 15506-21091 |          | 435               | 325-549    |          |

*Abbreviations:* IL-18, interleukin-18; IQR, interquartile range.

\**P* value for all (Kruskal-Wallis test: heterozygous genotype included); \*\**P* value for homozygous *versus* homozygous genotype.

Note: Hardy-Weinberg equilibrium was observed for all SNPs with the exception of the IL-18BP SNP rs3793941.



## REFERENCES

- 1 Radujkovic A, Dai H, Kordelas L, et al. Asymmetric dimethylarginine serum levels are associated with early mortality after allogeneic stem cell transplantation. *Haematologica* 2019; **104**: 827–34.
- 2 Novick D, Schwartsburd B, Pinkus R, et al. A novel IL-18BP ELISA shows elevated serum IL-18BP in sepsis and extensive decrease of free IL-18. *Cytokine* 2001; **14**: 334–42.
- 3 Sorrow ML, Maris MB, Storb R, et al. Hematopoietic cell transplantation (HCT)-specific comorbidity index: a new tool for risk assessment before allogeneic HCT. *Blood* 2005; **106**: 2912–19.
- 4 Jonckheere AR. A distribution free k-sample test against ordered alternatives. *Biometrika* 1954; **1-2**: 133–45.
- 5 Schemper M, Smith TL. A note on quantifying follow-up in studies of failure time. *Control Clin Trials* 1996; **17**: 343–6.
- 6 Gerds TA, Schumacher M. Consistent estimation of the expected Brier score in general survival models with right-censored event times. *Biom J* 2006; **48**: 1029–40.
- 7 Efron B, Tibshirani R. Improvements on cross-validation: The .632+ bootstrap method. *Journal of the American Statistical Association* 1997; **92**: 548–60.
- 8 Mogensen UB, Ishwaran H, Gerds TA. Evaluating Random Forests for Survival Analysis using Prediction Error Curves. *J Stat Softw* 2012; **50**: 1–23.
- 9 DeLong ER, DeLong DM, Clarke-Pearson DL. Comparing the areas under two or more correlated receiver operating characteristic curves: a nonparametric approach. *Biometrics* 1988; **44**: 837–45.
- 10 Gray R. A class of K-sample tests for comparing the cumulative incidence of a competing risk. *Annals of statistics* 1988; **6**: 1141–54.

## LEGEND TO SUPPLEMENTAL FIGURES

### Figure S1. Analysis of median pre-transplant serum levels of free IL-18 according to additional patient characteristics in the training cohort.

Box plots are depicted. *P* values were derived by the Kruskal-Wallis Test (in A and K) and the Mann-Whitney *U* test (in C, E-J). For trend analysis in B, D and L the Jonckheere trend test was applied.

*Abbreviations:* ALL, acute lymphoblastic leukaemia; AML, acute myeloid leukaemia; BMI, body-mass index; CRP, C-reactive protein; CsA, cyclosporine A; CVD, cardiovascular disease; FK, FK506 (tacrolimus); HCT-CI, hematopoietic cell transplantation-specific comorbidity index; IL-18, interleukin-18; KPS, Karnofsky performance status; MDS, myelodysplastic syndrome; MM, multiple myeloma; MMF, mycophenolate mofetil; MPN, myeloproliferative neoplasm; MTX, methotrexate; NHL, Non-Hodgkin lymphoma; PTCy, post-transplant cyclophosphamide; Q1-4, quartiles of the age distribution; ST2, soluble suppression of tumorigenicity 2.

### Figure S2. Prediction performance of the univariable pre-transplant free IL-18 models with regard to overall survival (OS) and non-relapse mortality (NRM).

The prediction error curves (left panel) representing the Brier score over time for the univariable pre-transplant free IL-18 models (red curves) with regard to OS and NRM in the training cohort (A and B, respectively), and in the validation cohort (C and D, respectively) show better, albeit slightly improved, performance in comparison to the respective references (Kaplan-Meier survival estimates for OS, Aalen-Johansen estimator for NRM) (black curves). Corresponding concordance indices are given in the right panel.

### Figure S3. Prediction performance of the multivariable pre-transplant free IL-18 models with regard to overall survival (OS) and non-relapse mortality (NRM).

The prediction error curves representing the Brier score over time for the univariable pre-transplant free IL-18 models (red curves) with regard to OS and NRM in the training cohort (A and B, respectively), and in the validation cohort (C and D, respectively) are depicted in the left panel. The models analyzed were cause-specific Cox models for OS and cause-specific Cox models for NRM. Covariates included age, disease stage, diagnosis, MMUD *versus* RD/MUD, conditioning intensity (reduced-intensity conditioning *versus* others), ATG treatment, and sex of donor and recipient.

“multiref” refers to the model that comprises only the confounding variables; no effect for pre-transplant free IL-18 has been estimated (blue curves). “multi+IL-18” refers to a multivariate model that takes into account the effect of pre-transplant free IL-18 (brown curves). The black curves represent the respective references (Kaplan-Meier survival estimates for OS, Aalen-Johansen estimator for NRM). Corresponding concordance indices are given in the right panel. Similar trends could be seen in both the training and the validation data set.

### Figure S4. Validation of the effect of pre-transplant free IL-18 with regard to overall survival (OS) and non-relapse mortality (NRM).

Prediction error analysis showing superimposition of the prediction error curves for OS and NRM. “offset” refers to a model that includes the effect of pre-transplant free IL-18 on OS and NRM as an offset. The parameter estimate for the effect results from the model based on the training data set. “Validation cohort” refers to the model for which the effect of pre-transplant free IL-18 on OS and NRM was estimated directly on the basis of the validation data set. For the estimation of the prediction error, the 632+ bootstrap method was applied. The resulting prediction error curve is a step function with jumps at every event time in the validation data set. For a detailed description of the validation method see “supplemental Statistical Methods”.

### Figure S5. Relationship between pre-transplant serum levels of total and free IL-18, IL-18BP<sub>a</sub> and CXCL9/MIG.

(A) IL-18 is known to induce IFN $\gamma$ . IFN $\gamma$  conversely is known to increase the gene expression and synthesis of both IL-18BP<sub>a</sub> and CXCL9/MIG.

(B) In the training cohort, IL-18 (total and free) and CXCL9/MIG and total IL-18 and IL-18BP<sub>a</sub> were positively (weakly) correlated, whereas IL-18BP<sub>a</sub> was moderately correlated to CXCL9/MIG. In the validation cohort, weak positive correlations between IL-18 (total and free) and CXCL9/MIG, and moderate positive correlations between total IL-18 and IL-18BP<sub>a</sub>, and IL-18BP<sub>a</sub> and CXCL9/MIG were observed.

### Figure S6. Alluvial diagram showing the changes in the composition of the quartiles of the free IL-18 distribution between the time-points pre-transplant and d+28 (n=395).

When comparing the distribution of the individual patients according to the quartiles of pre-transplant free IL-18 and d+28 free IL-18, the majority of the patients remained in their respective quartiles (i.e. the majority of patients who constituted the upper two quartiles pre-transplant remained in the upper two quartiles of the free IL-

18 distribution on d+28 post-transplant). The median level of pre-transplant free IL-18 was 471 pg/mL (IQR 335-704); the median level of d+28 free IL-18 was 443 pg/mL (IQR 322-614).

**Figure S7. Comparison of the predictive performance between pre-transplant free IL-18 and d+28 free IL-18 (as continuous variables) with regard to overall survival (OS) and non-relapse mortality (NRM) in the first post-transplant year.**

(A) ROC analysis indicated similar prognostic associations of pre-transplant and d+28 free IL-18 with both post-transplant OS and NRM (DeLong's test for OS and NRM:  $P=0.18$  and  $P=0.81$ , respectively).

(B) Prediction error analysis showed superimposition of the prediction error curves for OS and NRM, again indicating similar prognostic associations of pre-transplant and d+28 free IL-18 with both post-transplant OS and NRM.

**Figure S8. Illustration of the univariable associations of d+28 free IL-18 with overall survival (OS), non-relapse mortality (NRM) and relapse.**

Higher levels of d+28 free IL-18 were associated with worse OS, due to a higher hazard of NRM rather than relapse. Hazard ratios per 1- $\log_2$  increase are given.

**Figure S9. Heat map from Haploview.**

Hardy-Weinberg equilibrium was observed for 4 polymorphisms of the IL-18 gene (rs5744276, rs7106524, rs5744256, rs544354, rs360718) and 3 polymorphisms of the IL-18BP gene (rs61890895, rs3814721, rs2298455).

**Figure S10. Optimised cut-off of pre-transplant free IL-18 and associations with overall survival (OS) and non-relapse mortality (NRM) in the training and the validation cohorts.**

(A) An optimal cut-off determination with regard to post-transplant NRM was conducted in the training set yielding multiple cut-points (maxima). The maximum at 470 pg/mL ( $=2^{8.876}$ ) which also represents the median of the pre-transplant free IL-18 distribution in the training set, was chosen to stratify patients of both cohorts in high ( $\geq 470$  pg/mL) and low ( $< 470$  pg/mL) pre-transplant free IL-18 groups.

(B, C) In the training cohort, high pre-transplant free IL-18 status was correlated with worse OS and increased NRM.

(D, E) Similar associations were also observed in the validation cohort.

Hazard ratios are given for high ( $\geq 470$  pg/mL) vs. low ( $< 470$  pg/mL) pre-transplant free IL-18 group.

Figure S1

**A**

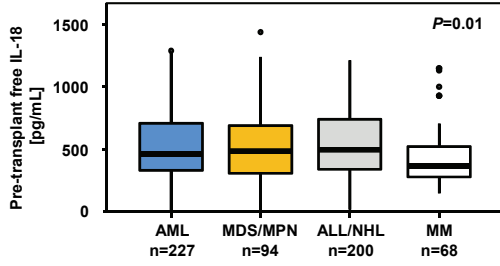

**B**

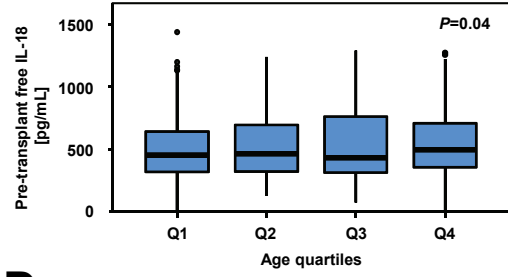

**C**

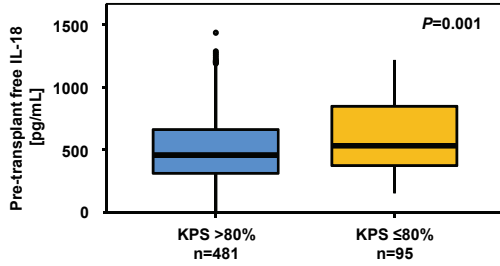

**D**

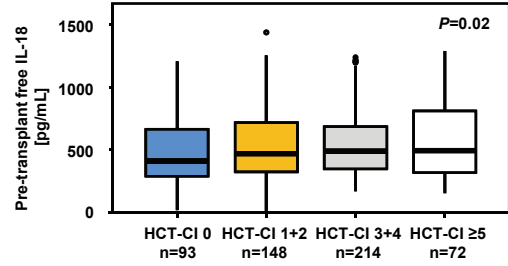

**E**

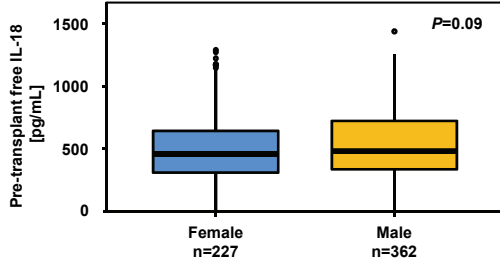

**F**

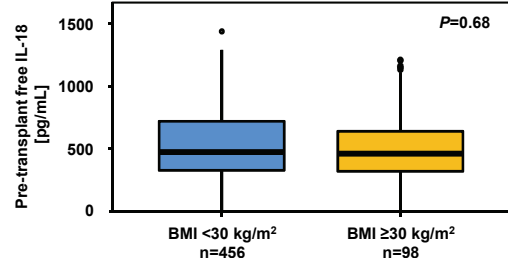

**G**

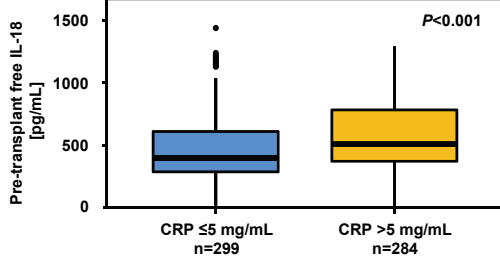

**H**

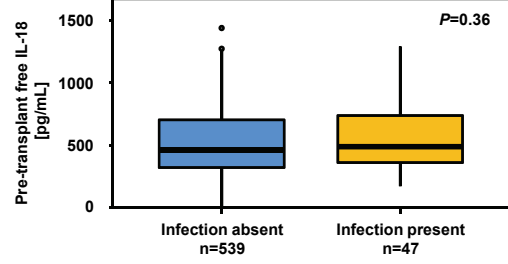

**I**

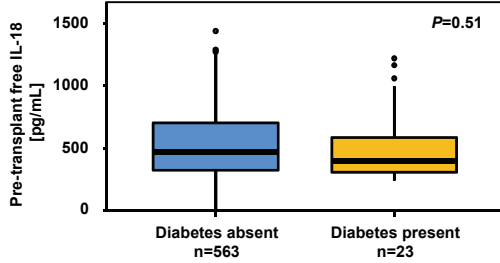

**J**

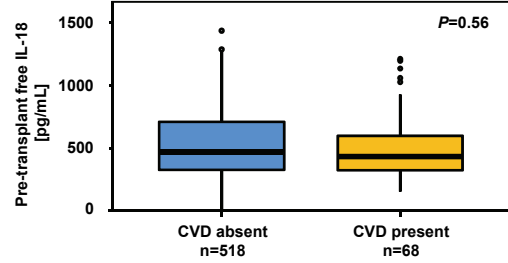

**K**

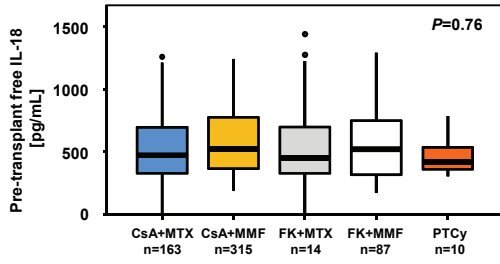

**L**

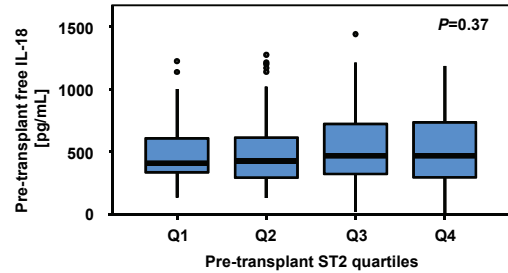

**Figure S2**

**A. OS, training cohort**

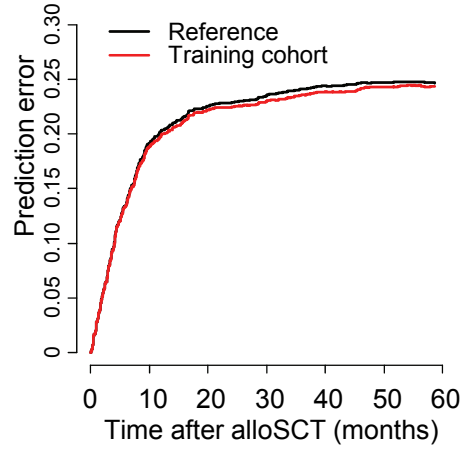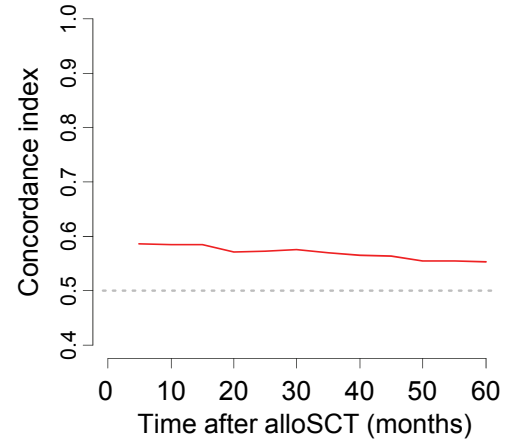

**B. NRM, training cohort**

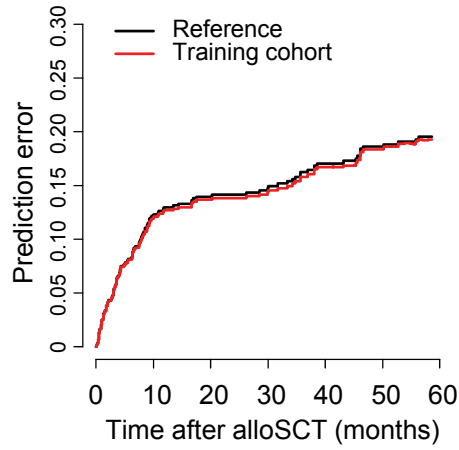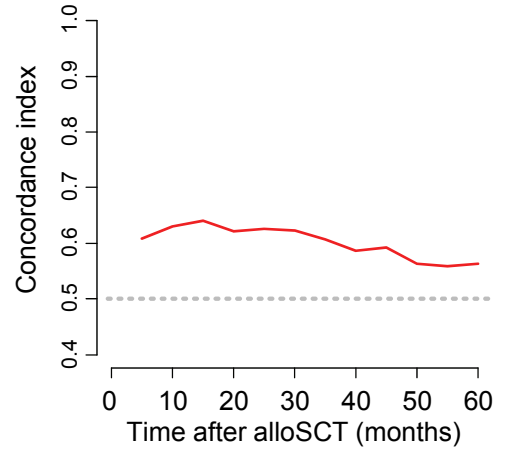

**C. OS, validation cohort**

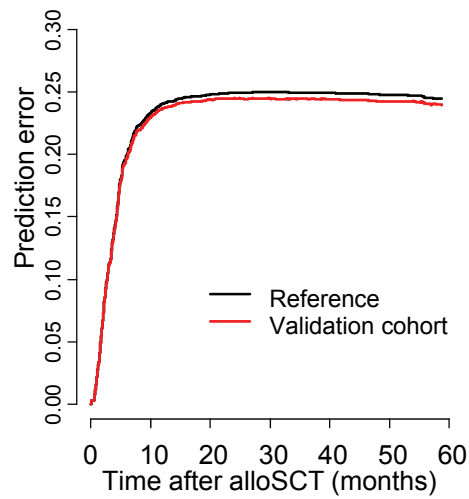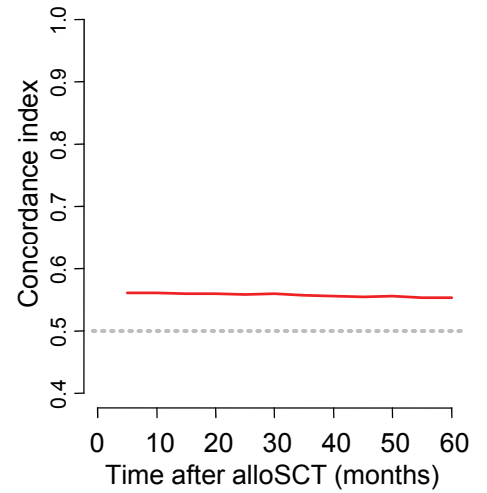

**D. NRM, validation cohort**

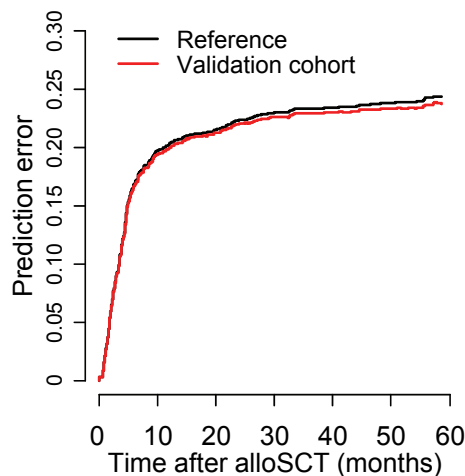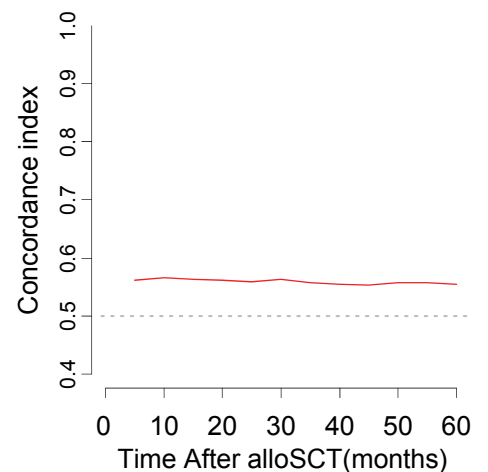

**Figure S3**

**A. OS, training cohort**

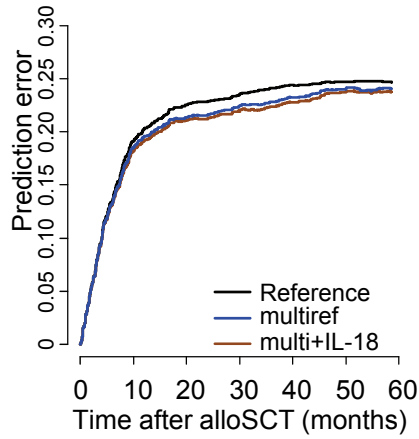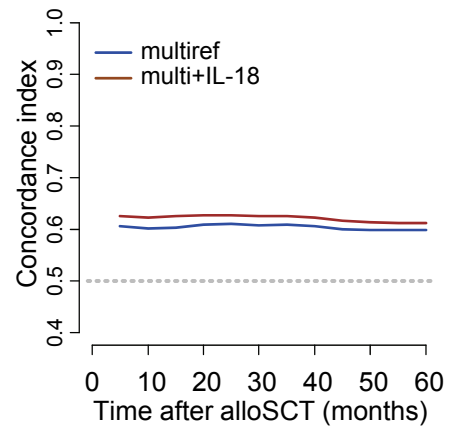

**B. NRM, training cohort**

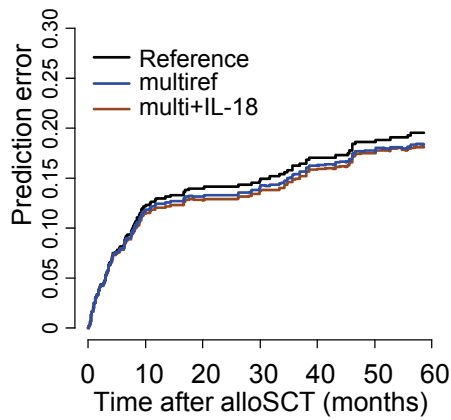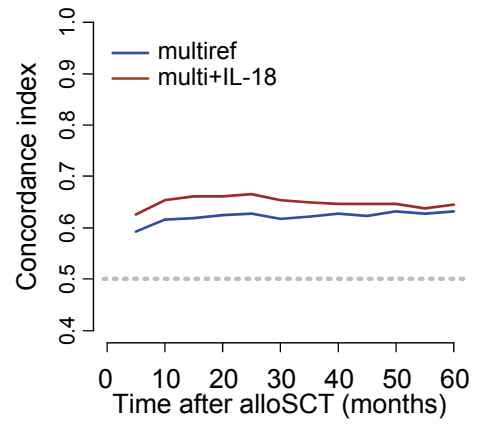

**C. OS, validation cohort**

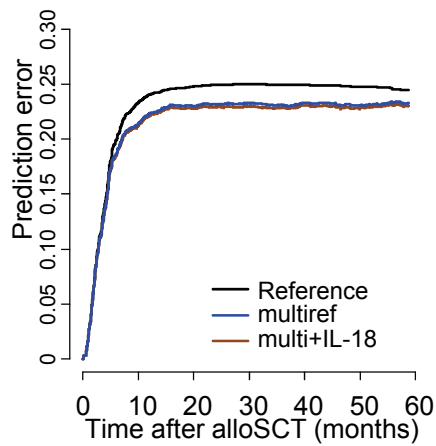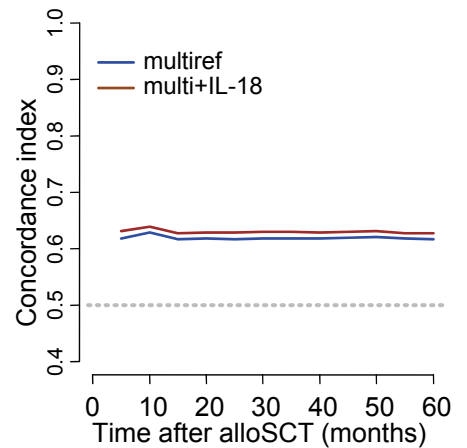

**D. NRM, validation cohort**

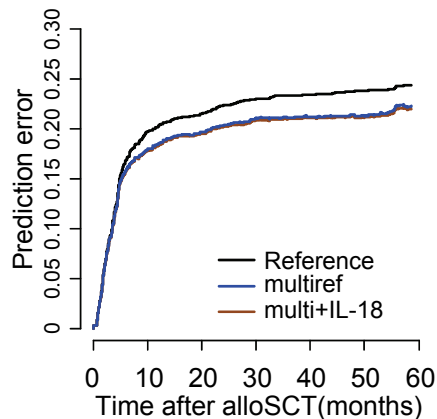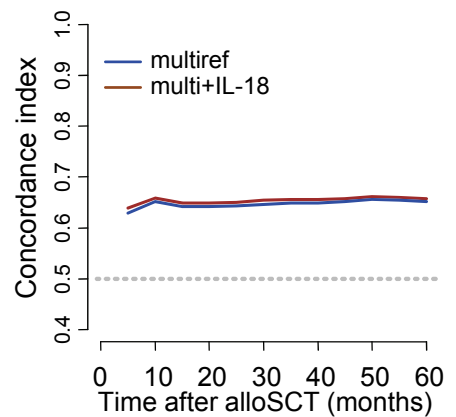

**Figure S4**

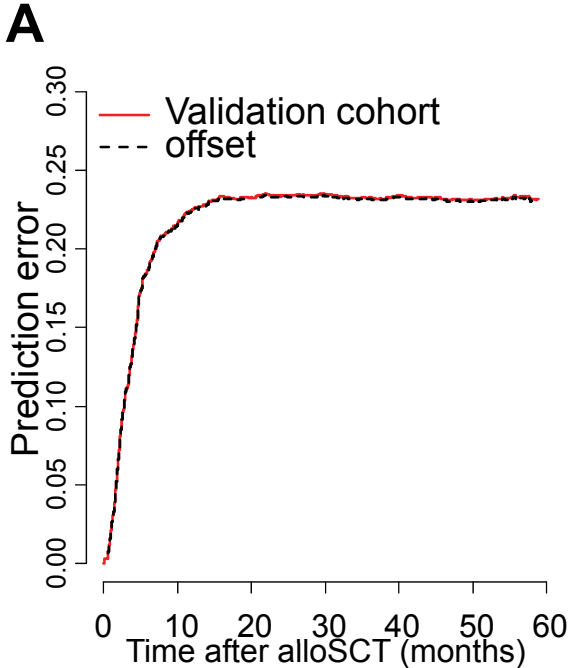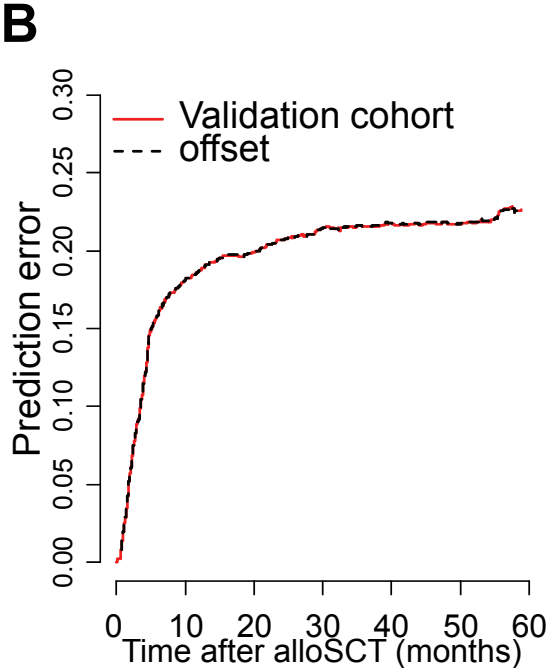

Figure S5

A

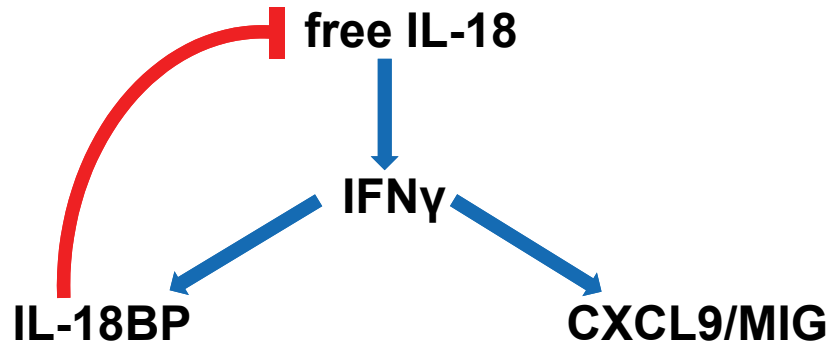

B

|                      | Training cohort (n=589) |          |                      |          | Validation cohort (n=399) |          |                      |          |
|----------------------|-------------------------|----------|----------------------|----------|---------------------------|----------|----------------------|----------|
|                      | CXCL9/MIG               |          | IL-18BP <sub>a</sub> |          | CXCL9/MIG                 |          | IL-18BP <sub>a</sub> |          |
|                      | Spearman's rho          | <i>P</i> | Spearman's rho       | <i>P</i> | Spearman's rho            | <i>P</i> | Spearman's rho       | <i>P</i> |
| Total IL-18          | 0.34                    | <0.0001  | 0.21                 | <0.0001  | 0.28                      | <0.0001  | 0.39                 | <0.0001  |
| Free IL-18           | 0.28                    | <0.0001  |                      |          | 0.24                      | <0.0001  |                      |          |
| IL-18BP <sub>a</sub> | 0.53                    | <0.0001  |                      |          | 0.41                      | <0.0001  |                      |          |



Figure S6

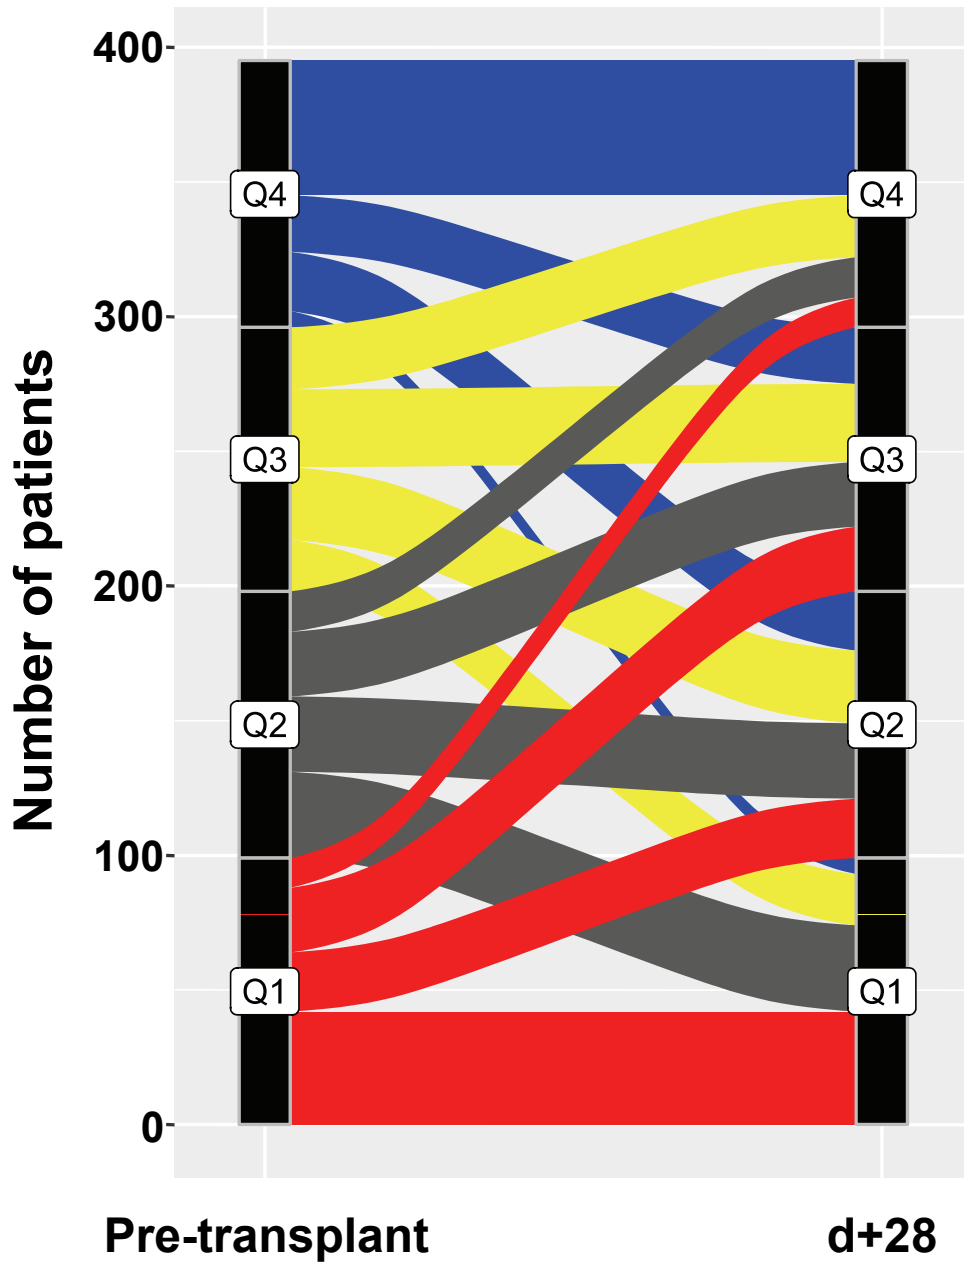

**Figure S7**

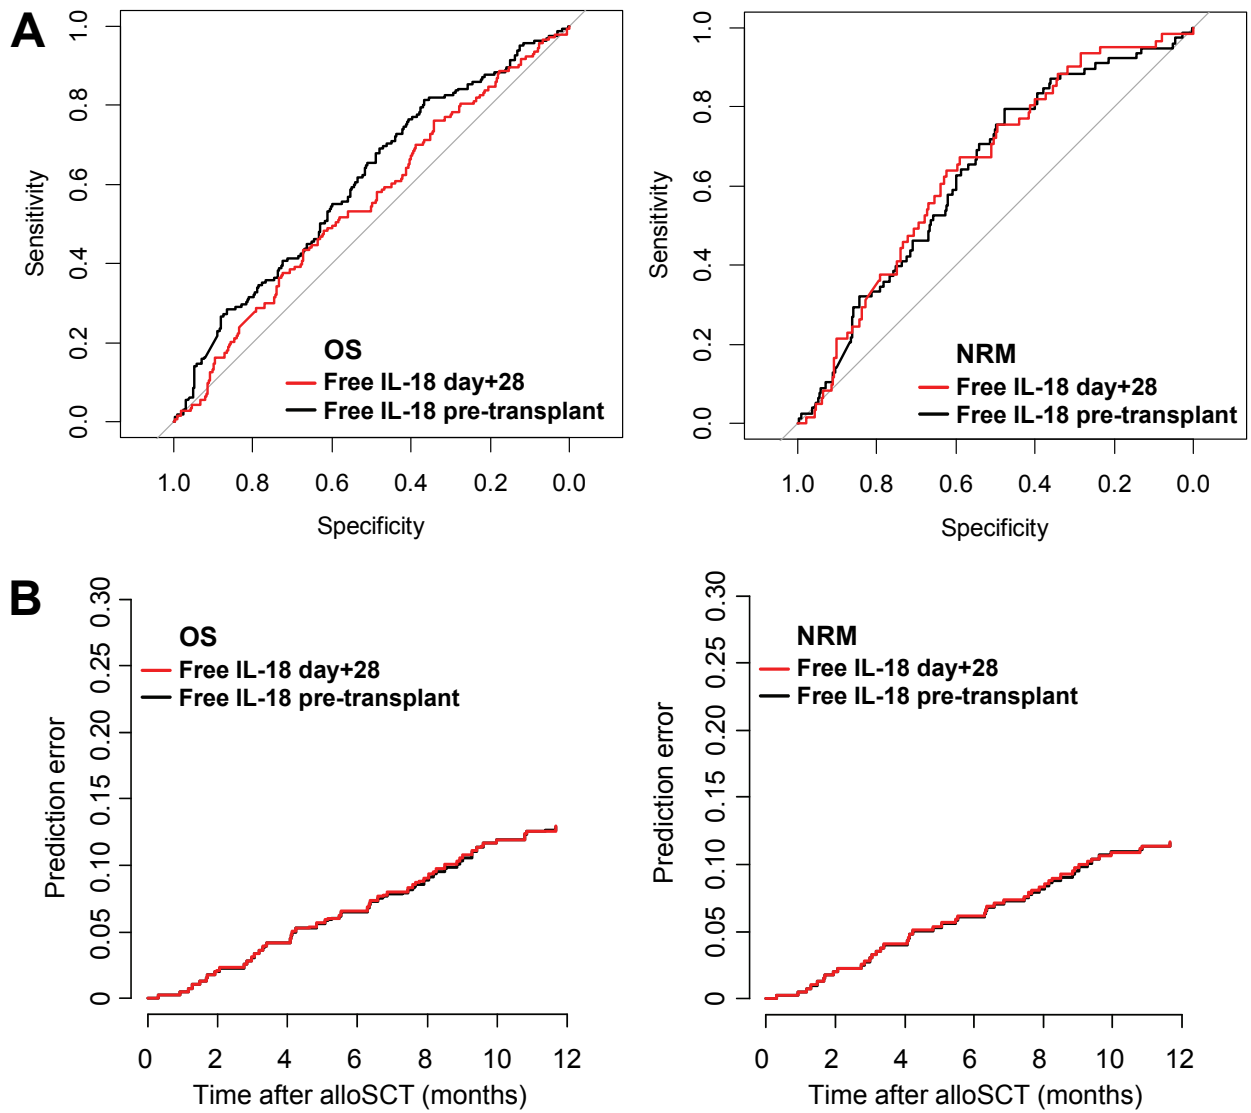

**Figure S8**

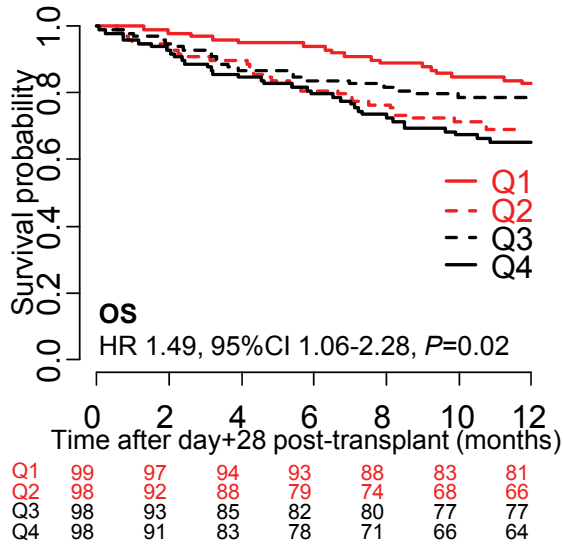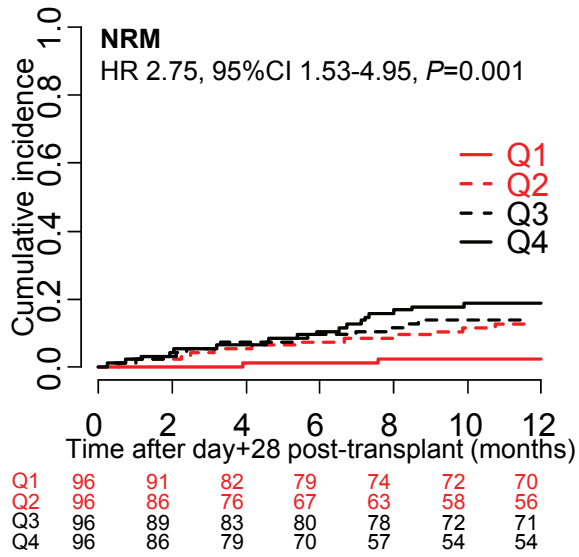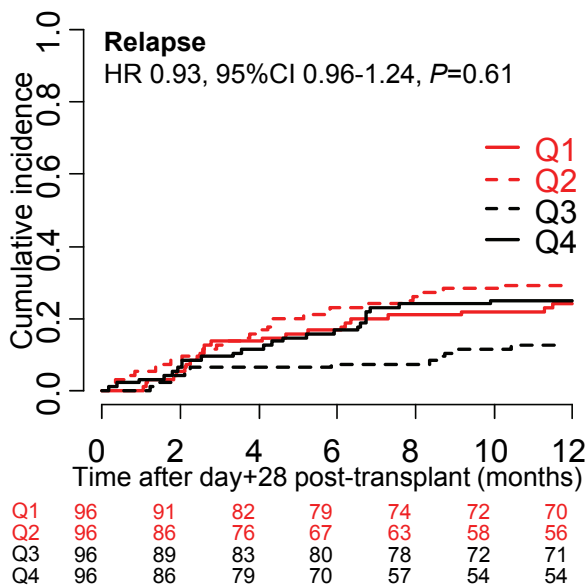

Figure S9

IL-18

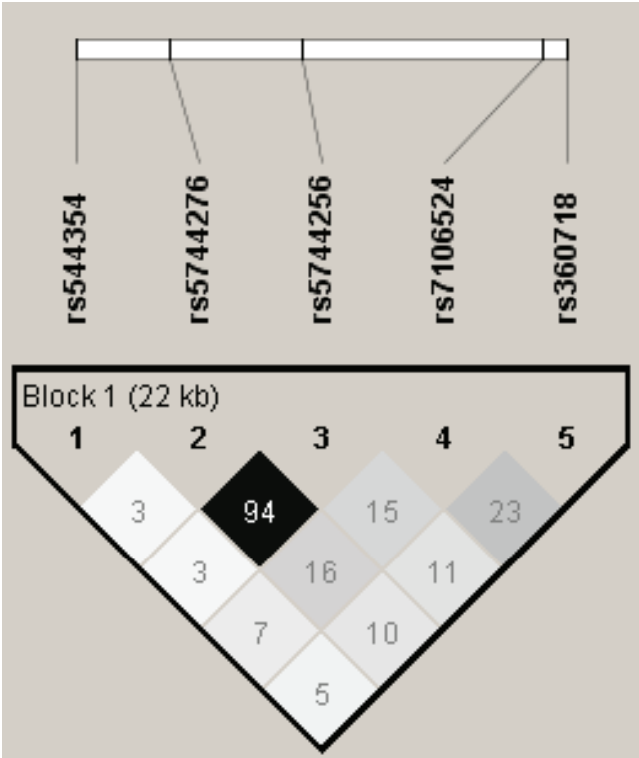

IL-18BP

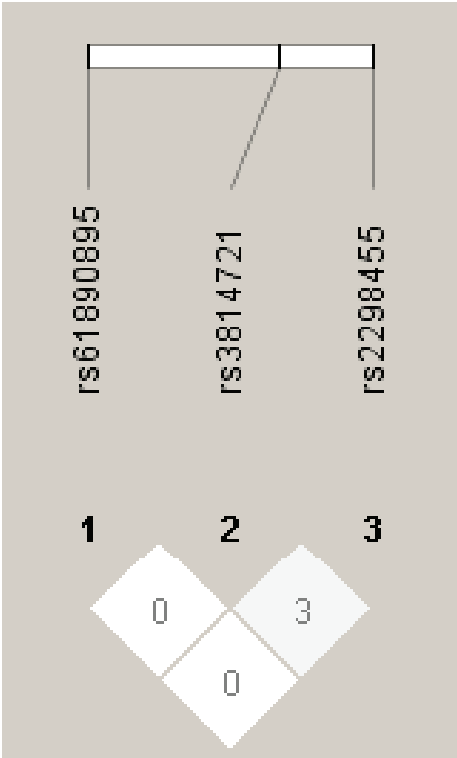

**Figure S10**

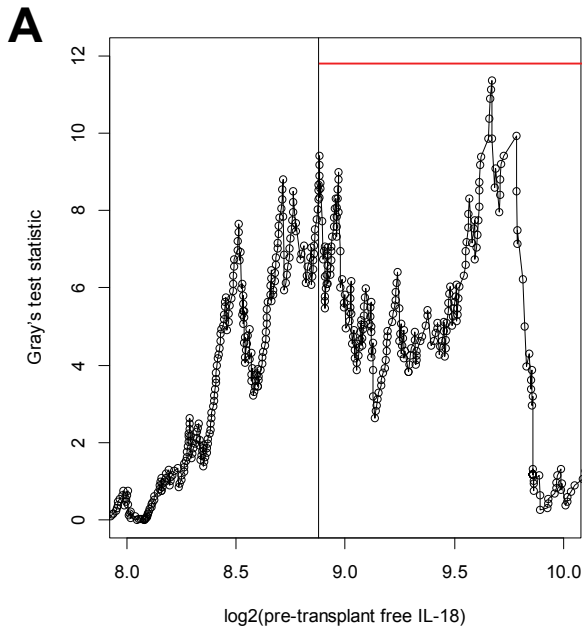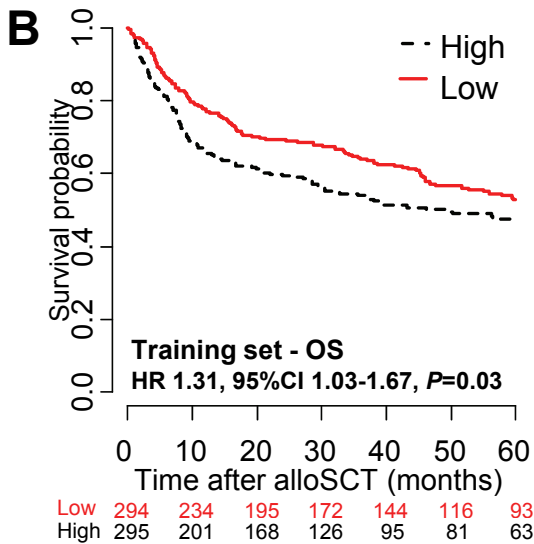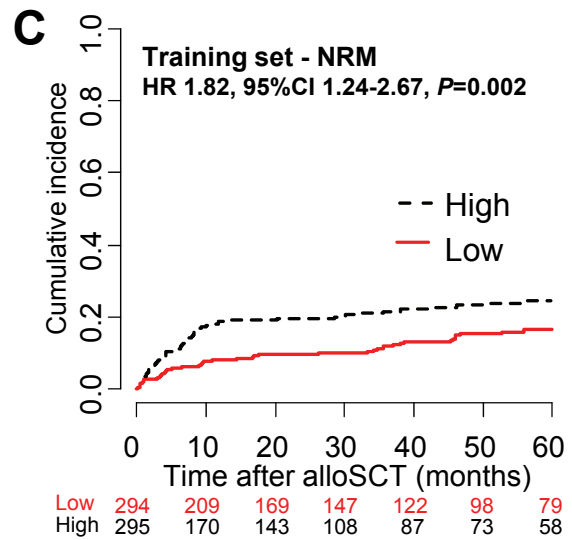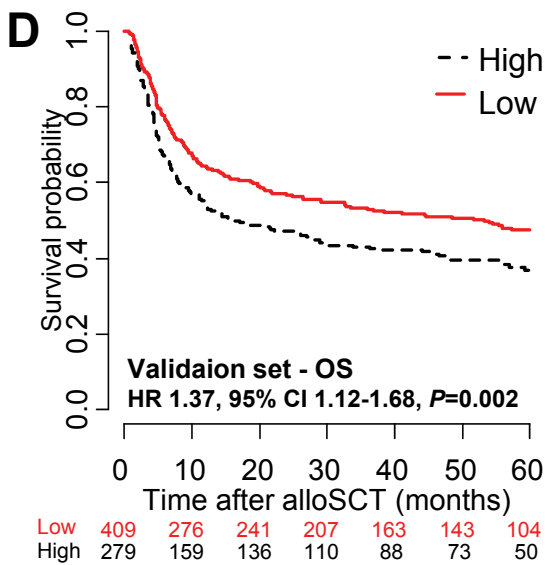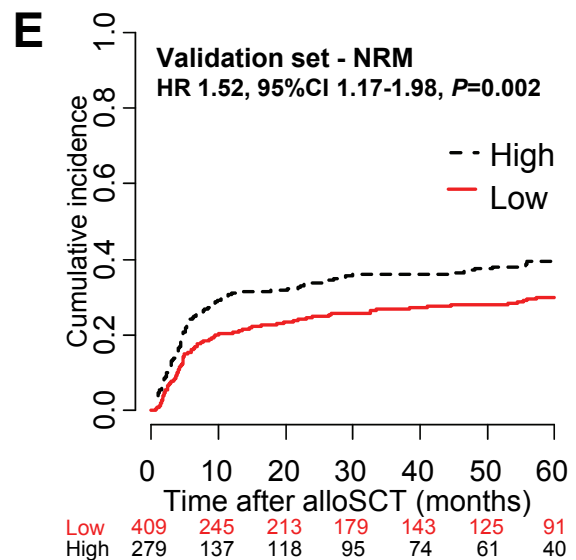

Supplement: mmc1.pdf [file mmc1.pdf]
